# Supplementary material
Source: PubMed Central journal article supplement (PMC4326312)
Supplement: supp_dju412_jnci_JNCI_14_0590_s01.pdf [file supp_dju412_jnci_JNCI_14_0590_s01.pdf]

**Supplementary Table 1. J-Codes for Chemotherapies Used in Breast, Lung, Ovarian, and Prostate Cancer**

| Drug of Interest | J-Codes                                                                           | Typically Used in Cancer Setting |      |         |          |
|------------------|-----------------------------------------------------------------------------------|----------------------------------|------|---------|----------|
|                  |                                                                                   | Breast                           | Lung | Ovarian | Prostate |
| Docetaxel        | J9170                                                                             | X                                | X    | X       | X        |
| Other Drugs      |                                                                                   |                                  |      |         |          |
| 5-FU             | J9190                                                                             | X                                |      |         |          |
| Cabazitaxel      | J9043                                                                             |                                  |      |         | X        |
| Capcitabine      | J8520, J8521                                                                      | X                                |      |         |          |
| Carboplatin      | J9045                                                                             |                                  | X    | X       | X        |
| Cisplatin        | J9060, J9062                                                                      |                                  |      | X       |          |
| Cyclophosphamide | J8530, J9070, J9080, J9090,<br>J9091, J9092, J9093, J9094,<br>J9095, J9096, J9097 | X                                | X    |         |          |
| Doxorubicin      | J9000                                                                             | X                                | X    | X       | X        |
| Etoposide        | J9181, J9182, J8560                                                               |                                  |      | X       | X        |
| Gemcitabine      | J9201                                                                             | X                                | X    | X       |          |
| Halaven          | J9179                                                                             | X                                |      |         |          |
| Ifosfamide       | J9208                                                                             |                                  | X    |         |          |
| Irinotecan       | J9206                                                                             |                                  | X    |         |          |
| Ixabepilone      | J9207                                                                             | X                                |      |         |          |
| Methotrexate     | J9250, J9260                                                                      | X                                |      |         |          |
| Mitoxantrone     | J9293                                                                             |                                  |      |         | X        |

|              |              |   |   |   |   |
|--------------|--------------|---|---|---|---|
| Paclitaxel   | J9265        | X | X | X | X |
| Pemetrexed   | J9305, C9213 |   | X |   |   |
| Topotecan    | J9350        |   | X | X |   |
| Unspecified* | J8999, J9999 | X | X | X | X |
| Vinblastine  | J9360        |   | X |   | X |
| Vinorelbine  | J9390        | X | X | X | X |

\* Unspecified antineoplastic drugs.
